# Supplementary material for: Protected areas can provide net benefits without reducing the loss of ecosystem area
Source: Research Square preprint supplement (doi:10.21203/rs.3.rs-6820410/v1), 2025-06-20
Supplement: Supplementary file 1 [file 449d3edac088e747664760d2.docx]

**Supplementary Information for**

Protected areas can provide net benefits without reducing the loss of ecosystem area

This document provides additional detail on selected features of the data and methods described in the Methods section.

**1. Mapping mangrove presence/absence**

We created a 30-m resolution spatial dataset on mangrove cover in the coastal region of mainland India for the years 1975, 1990, 2005, and 2015 using Landsat satellite data. This dataset was part of a broader project to map mangrove cover across all of South Asia, excluding the Maldives. The dataset is binary: it indicates mangrove presence or absence. We used only the 1975, 1990, and 2015 data in the current study.

The South Asian mangrove mapping project used the same source of satellite images and the same techniques as in Ref. (1). We obtained top-of-atmosphere Landsat images for the four years from the Google Earth Engine archive. If images for a given year were not available or were obscured by clouds, then we substituted images from the nearest year. We analyzed the images in the cloud-computing environment of Google Earth Engine. We classified the images into three land-cover classes—mangrove, nonmangrove, and water—using a supervised classification approach with a random forest classifier. We performed the classification separately for regions of interest (ROIs) that spanned the entire South Asian coast. We classified the ROIs one at a time, with training points for each land-cover class selected from within the same ROIs to minimize heterogeneity and improve classification accuracy. We based selection of training points on the spectral signature of the Landsat data (bands 1–5 and 7) and information from very high-resolution satellite data (WorldView, GeoEye).

We edited the data in ERDAS IMAGINE, removing obvious errors such as false classification of mangroves in hilly areas. We converted the edited data to include the mangrove class only. For the 1975 Landsat data, we changed the spatial resolution from the original 60 m to 30 m. As a final step, we mosaicked all the ROIs together to form a single, 1-bit dataset for South Asia and clipped the India portion using the country’s boundary.

**2. Creating the sample for matching**

We created the sample for the matching analysis by first defining “mangrove habitat” as any pixel where mangroves were present in at least one of the four years in the mangrove cover dataset. We then randomly drew 22,659 pixels from within mangrove habitat thus defined. We set the minimum distance between the centroids of sampled pixels at 200 m to prevent multiple pixels being drawn from the same mangrove stand. This distance is consistent with the use of a 1-hectare minimum mangrove area in research on mangrove biodiversity2.

In sequence, we then dropped: 11,362 pixels where mangroves were absent in 1990; 71 pixels in a protected area established in 1997 (see section 3); and 28 pixels that were missing data on two covariates used in the matching models. The remaining 11,198 pixels in the final sample were distributed across eight states, 42 districts (subdivisions of states), and 126 tehsils (subdivisions of districts). The states included all coastal states and union territories (regions administered by the national government) in mainland India except one small state (Goa) and two small union territories (Daman and Diu, Puducherry). Pixels in these three subdivisions were dropped for one or more of the reasons given above.

**3. Identifying and mapping mangrove protected areas**

We identified six national parks (NPs) and 23 wildlife sanctuaries (WLSs) in the coastal region of mainland India by reviewing three protected area (PA) databases: the Government of India’s database3, a database created by an Indian conservation organization4, and the World Database on Protected Areas (WDPA)5. Alphabetically by state and with establishment dates in parentheses, the 29 PAs were:

- **Andhra Pradesh:** Coringa WLS (1978)*; Krishna WLS (1989)*; Nelapattu WLS (1976)**; Pulicat Lake WLS (1976)*
- **Daman & Diu:** Fudam WLS (1991)***
- **Goa:** Dr. Salim Ali Bird (Chorao) WLS (1988)***
- **Gujarat:** Blackbuck (Velavadar) NP (1976)***; Gaga Great Indian Bustard WLS (1988)****; Gulf of Kachchh Marine NP (1980)**; Kachchh Desert WLS (1986)****; Kachchh (Lala) Great Indian Bustard WLS (1995)****; Khijadiya WLS (1981)***; Narayan Sarovar Chinkara WLS (1981)**; Wild Ass WLS (1973)****
- **Kerala:** Mangalavanam Bird WLS (2004)***
- **Maharashtra:** Sanjay Gandhi (Borivilli) NP (1983)***
- **Odisha:** Balukhand Konark WLS (1984)*; Bhitarkanika NP (1988)*; Bhitarkanika WLS (1975)*; Chilka (Nalaban) WLS (1987)***; Gahirmatha (Marine) WLS (1997)*
- **Tamil Nadu:** Gulf of Mannar Marine NP (1980)**; Point Calimere WLS (1967)*; Pulicat Lake Bird WLS (1980)**
- **West Bengal:** Haliday Island WLS (1976)*; Lothian Island WLS (1976)*; Sajnakhali WLS (1976)*; Sunderban NP (1984)*; West Sunderban WLS (2013)*.

Asterisks indicate information sources on PA boundaries: *shapefile from Ref. (4) (13 PAs); **shapefile from Ref. (5) (5 PAs); ***digitization of boundaries shown on GIS basemap6 (6 PAs); and ****digitization of boundaries shown in JPG file3 (5 PAs).

If boundary information was available from more than one source, then we used the sources in the following order from most to least preferred: Refs. (4), (3), (6), and (5). The WDPA5 is a commonly used global PA database, but the boundaries in it for most of India’s mangrove PAs were missing or obviously incorrect (e.g., perfect circles). We checked boundary information from all sources against text descriptions and sketch maps included in the historical gazette notifications that announced the PAs7. The gazette notifications also provided brief statements on the reasons for PA establishment.

The final dataset included pixels in ten PAs (three NPs, seven WLSs) classified as established during 1975–1989 and protected during 1990–2015:

- **Andhra Pradesh:** Coringa WLS, Krishna WLS
- **Gujarat:** Gulf of Kachchh Marine NP, Khijadiya WLS
- **Odisha:** Bhitarkanika WLS
- **Tamil Nadu:** Gulf of Mannar Marine NP
- **West Bengal:** Haliday Island WLS, Lothian Island WLS, Sajnakhali WLS, Sunderban NP.

Of the remaining 19 PAs, the final dataset did not include any pixels in the two that were established before 1975, the earliest year with data available for the pretreatment matching covariates. It did not include any pixels in 15 other, smaller PAs for the following reasons: 11 were missing data for one or more years in the mangrove presence/absence dataset; three had no mangroves present in 1990; and one was missing data on two matching covariates. The 18th PA was a medium-sized one, Gahirmatha (Marine) WLS in Odisha State, which was established at an intermediate point (1997) of the 1990–2015 analysis period. We dropped pixels in it because we aimed to analyze pixels with unchanging treatment status. The final PA was a large one established in 2013, West Sunderban WLS in West Bengal State. We kept pixels in it but classified them as unprotected during the entirety of 1990–2015 given that its establishment date was so close to the end of the period.

**4. Choosing an impact evaluation method**

Nearest-neighbor covariate matching and propensity-score matching are the most commonly applied matching methods8. Recent criticism of propensity score matching9 led us to choose nearest-neighbor covariate matching instead of propensity-score matching. We did not use post-matching regression10 in view of a recent finding that standard errors are not well-defined in that method when matching is with replacement11. We did not use difference-in-differences, a nonmatching method that can control for the effects of unobserved unit characteristics, because we lacked the pretreatment (i.e., pre-1975) data on mangrove cover needed to investigate a key assumption of that method, the parallel trends assumption. In the nearest-neighbor matching, we used a multivariate metric, the Mahalanobis distance, to measure the similarity of pretreatment characteristics of the treated and control pixels.

**5. Defining and generating potential matching covariates**

State governments in India establish national parks (NPs) and wildlife sanctuaries (WLSs) under a national law, the 1972 Wildlife Protection Act. We assumed state governments considered both the benefits and costs of protection when they decided whether to establish mangrove PAs during 1975–1989. We created a set of 16 covariates that we expected might have been associated with perceived benefits and costs of protection during that period, deforestation during 1990–2015, or both.

Regarding the benefits of protection, as its name suggests, the 1972 Wildlife Protection Act emphasized the protection of fauna. We generated two covariates related to this intended benefit:

1. **Tiger habitat.** Dummy variable equaling 1 if pixel was in tiger habitat and 0 otherwise. Source: GIS analysis of feature layer12. Values: 34% 1, 66% 0.
2. **Bird species.** Total number of bird species whose ranges overlapped a pixel. Source: GIS analysis of shapefiles13. Mean = 222 species, SD = 80 species, minimum = 5 species, maximum = 349 species.

Regarding costs, the covariate set included a direct measure of the opportunity cost of protection. We assumed deforested mangroves were converted to agriculture, which is the dominant use of converted mangroves in India:

1. **Net crop income (district-level, 1975, constant 2010 rupees per hectare).** Source: Summed district-level gross revenue (Indian rupees, INR) in 1975 across all available crops (barley, castor, cotton, cowpea, finger millet, groundnut, maize, paddy, pearl millet, pigeon pea, rapeseed and mustard, sesame, sugar cane, sorghum, wheat)14. Expressed per hectare using data on district-level net cropped area in 1975 from the same source. Converted to net income per hectare using state-level estimates of cropping costs as a share of gross revenue15. Converted to constant (i.e., inflation-adjusted) 2010 INR using the consumer price index for India16. Mean = INR 11,543 ha-1, SD = INR 2,531 ha-1, minimum = INR 2,014 ha-1, maximum = INR 22,917 ha-1.

In addition, the set included four covariates that we expected might have affected opportunity cost through their effects on either a pixel’s productivity for agriculture or its accessibility to agricultural markets:

1. **Agro-ecological zones 2, 5, and 19.** Dummy variable equaling 1 if pixel was in any of the three indicated zones and 0 otherwise. Source: Classification of districts based on examination of map of agro-ecological zones in India17. Agro-ecological zones in India are distinctive combinations of soils, climate, and growing period length. The three zones are all on India’s west coast. We aggregated them because they individually include small numbers of pixels. Pixels in our sample also occurred in agro-ecological zone 18, which is on the country’s east coast. The dummy variable for agro-ecological zones 2, 5, and 19 is thus equivalent to a dummy variable for India’s west coast. Values: 9% 1, 19% 0.
2. **Distance to mangrove edge (1975, meters).** Distance to the nearest pixel classified as nonmangrove in 1975, including water bodies. Source: GIS analysis of 1975 mangrove dataset. Mean = 143 m, SD = 169 m, minimum = 0 m, maximum = 1,534 m.
3. **Distance to major road (early 1980s, meters).** Distance to the nearest major road in the early 1980s. Source: GIS analysis of feature layer18. We assumed India’s major road infrastructure in coastal regions remained unchanged between 1975 and the early 1980s. Mean = 31,097 m, SD = 20,536 m, minimum = 9 m, maximum = 75,624 m.
4. **Road density (district-level, 1975, meters per hectare).** District-level road density in 1975. Source: analysis of district-level data on total road length and district area14. Mean = 7.10 m ha-1, SD = 9.82 m ha-1, minimum = 0.64 m ha-1, maximum = 108 m ha-1.

The set included four ecological variables that we expected might have affected the value of pixels for either wildlife habitat or agriculture:

1. **Coastal system: small delta.** Dummy variable equaling 1 if pixel was in a small delta and 0 otherwise. Source: GIS analysis of gridded data (0.5-degree resolution)19, which indicates India’s mangroves are found in three types of coastal systems: small deltas, lagoons, and tidal systems. Values: 19% 1, 81% 0.
2. **Coastal system: lagoon.** Dummy variable equaling 1 if pixel was in a lagoon and 0 otherwise. Source: See preceding covariate. Values: 4% 1, 96% 0.
3. **Distance to coast (meters).** Distance to nearest coastline. Source: GIS analysis of shapefiles for subdistrict boundaries in India20. We compared coastal boundaries to the coastline shown in Google Earth and, to ensure that the variable was nonnegative for all pixels, set the value of the variable equal to 0 m for any pixels located on the ocean side of the boundary. Mean = 3,244 m, SD = 3,237 m, minimum = 0 m, maximum = 28,800 m.
4. **Potential carbon stock (metric tons per hectare).** Total carbon content across three carbon pools—above-ground biomass, below-ground biomass, soil down to a depth of 100 cm—in undisturbed, natural mangroves. Source: see section 9. Mean = 250 t ha-1, SD = 73 t ha-1, minimum = 173 t ha-1, maximum = 635 t ha-1.

We expected that, in weighing the prospective benefits and costs of protection, state governments might have considered the share of mangroves that were already protected, the human populations potentially affected (positively or negatively) by protection, and the proximity of those populations to state-level decisionmakers. The set included four covariates related to these factors:

1. **Protected share, state-level (pre-1975).** Fraction of a state’s mangrove habitat in PAs established before 1975. Source: GIS analysis of mangrove and mangrove PA datasets generated for this study; see sections 1 and 3. Mean = 0.099, SD = 0.066, minimum = 0, maximum = 0.143.
2. **Protected share, district-level (pre-1975).** Fraction of a district’s mangrove habitat in PAs established before 1975. Source: See preceding covariate. Mean = 0.010, SD = 0.102, minimum = 0, maximum = 0.951.
3. **Population density (tehsil-level, 1970, people per km2).** Human population density in 1970 in the tehsil where a pixel was located. Source: GIS analysis of gridded data (1-km resolution)21. Mean = 337, SD = 1,386, minimum = 4, maximum = 23,834 people per km2.
4. **Distance to state capital (meters)**. Straight-line distance from pixel to state capital. Source: GIS analysis. Mean = 150,060 m, SD = 112,776 m, minimum = 738 m, maximum = 550,442 m.

All 15 of these covariates could conceivably have affected deforestation during 1990–2015 in addition to protection decisions during 1975–1989. For example, during 1990–2015, park authorities might have allocated more monitoring and enforcement resources to locations that were richer in fauna (covariates 1–2, possibly 8–11) and had easier access (covariates 5–7), thus reducing deforestation in those locations relative to others. They might have been better at monitoring and enforcing new PAs if they had experience monitoring and enforcing existing PAs (covariates 12–13) and more successful at obtaining additional resources if new PAs were closer to government decisionmakers (covariate 15). Local people might have been less likely to encroach on PAs that were less valuable for agriculture (covariate 3 and possibly 4–11) or were in locations with lower population densities (covariate 14).

The final covariate could help explain loss of mangrove cover for a natural reason, i.e., storm damage:

1. **Cyclone frequency.** Dummy variable equaling 1 if pixel was in a higher frequency cyclone zone and 0 otherwise. Source: GIS analysis of gridded data (2.5-minute resolution)22. Nearly all pixels had values of 0 or 5 on the ordinal scale of the original data, with 5 indicating greater cyclone frequency. We coded values of 5+ as 1 and all others as 0. Values: 77% 1, 23% 0.

Evidence on the ability of mangroves to reduce storm damage in India has become stronger in the past two decades23. If this evidence prompted park authorities to strengthen monitoring and enforcement in cyclone-prone locations, then mangrove cover loss might have been less likely, not more likely, to occur in those locations.

The expansion of ecotourism globally, including in Indian mangroves24, is another notable trend during the past two decades. It might have reduced the risk of deforestation by making deforestation more likely to be detected in locations visited by tourists and by generating public pressure to reduce deforestation. The covariates for faunal richness (covariates 1–2) and accessibility (covariates 5–7) relate to this confounding factor in addition to the ones mentioned above.

The association of these factors with the components of the directed acyclic graph (Fig. 2) can be summarized as follows. Biophysical factors (**green ellipses**): soil quality and productivity (factors 4 and 8–11); cyclone (factors 10 and 16); wildlife habitat (factors 1, 2, and 8–11); and human-wildlife conflict (factors 1 and 14). Socioeconomic factors (**orange ellipses**): agricultural markets (factor 14); accessibility (factors 5–7); agricultural land value (factor 3); and natural heritage and tourism value (factors 1, 2, 5–7, and 11). Governmental processes (**gray ellipses**): political incentives (factors 12–15); and monitoring and enforcement (factors 1–2, 5–7 , and 12–13).

Slope and elevation are commonly used covariates in matching studies on forest conservation programs. We excluded them because they vary negligibly within the intertidal zones where mangroves occur. The coastal system dummies and the distance to coast covariate are more suitable topographical covariates for mangroves than slope and elevation.

**6. Selecting covariates to include in the matching models and improving common support**

We used CovSel Algorithm 225 to remove redundant covariates from our set of 16 potential ones. This algorithm first removes covariates that are independent of potential outcomes conditional on the other covariates and then, from the resulting reduced covariate subset, removes ones that are conditionally independent of treatment. It has generally outperformed other algorithms in simulation studies26,27 and can be applied using an R package28.

After CovSel selected the six covariates we used on the matching models—tiger habitat, potential carbon stock, cyclone frequency, 1970 population density at the tehsil level, 1975 road density at the district level, and 1975 share of protected areas in total district area—we helped ensure common support10 for the continuous covariates by dropping treated (untreated) pixels whose values for a given covariate were more than 5% outside the covariate’s range for untreated (treated) pixels. This trimming process eliminated 723 untreated pixels but only one treated pixel, reducing the dataset to 6,269 treated pixels and 4,205 untreated pixels.

**7. Assessing covariate balance**

We did not assess covariate balance in the matched groups of treated and control pixels by testing differences between the two groups, as such tests are not statistically valid29,30. Instead, we assessed it using the following guidelines29: (i) the absolute value of the standardized mean difference (SMD) between the treated and control groups should be below 0.1; and (ii) the ratio of the control-group variance to the treated-group variance should be within bounds given by the 2.5th and 97.5th percentiles of an *F* distribution with degrees of freedom equal to the number of treated pixels minus one, which yielded lower and upper bounds of 0.952–1.051. The SMDs and variance ratios satisfied these guidelines for all six covariates (Supplementary Table 1). The binary covariates for tiger habitat and cyclone frequency were balanced perfectly because we matched exactly on them (i.e., we required treated-control pairs to have the same 0 or 1 values for them).

**8. Controlling for spillovers**

The estimated average treatment effects on the treated (ATETs) increased continuously and substantially when we progressively excluded untreated pixels that were within a 1–4 km buffer of a PA (Supplementary Table 2). This pattern is consistent with PAs having a halo effect31: monitoring and enforcement activities along PA boundaries reduced deforestation in adjacent unprotected forests. The ATETs became unstable for larger buffers. This instability was likely due to a sharp reduction in the number of untreated pixels available to serve as controls: only 2,137 for 8 km, down from 4,205 for 0 km and 3,154 for 4 km.

The reduction in the pool of potential control pixels caused covariate balance to worsen as the buffer increased beyond 4 km. The balance measures reported in the previous section refer to the unbuffered sample. Balance for the 4 km buffer changed little from balance for the unbuffered sample, with all the variance ratios remaining within the recommended range and only one covariate (1970 population density) having an SMD that slightly exceeded the 0.1 guideline (0.115).

**9. Estimating potential carbon stocks in pixels with mangroves present**

We followed prior work32 in using published models to generate covariate 11 in section 5, which estimates the potential carbon stock in each pixel: i.e., the stock in undisturbed, natural mangrove forests. We began by employing published models33 to estimate potential above-ground biomass (AGB) and below-ground biomass (BGB), both in t ha-1. The model for AGB was

,

where *BIO*10, *BIO*11, *BIO*16, and *BIO*17 are, respectively, mean temperature of the warmest quarter of the year, mean temperature of the coldest quarter, precipitation of the wettest quarter, and precipitation of the driest quarter. We obtained these variables from the 2.5-minute resolution WorldClim database (version 2.0)34, which refers to historical values during 1970–2000. We imputed missing values by using the values of the nearest available grid cells. The model for BGB biomass was

For soil carbon stocks down to 100 cm, we began with a published 30-m resolution dataset35, which provided data on approximately three-fifths of the pixels in our sample. We imputed missing values by following prior work36 that related soil carbon stocks to latitude and four bioclimatic variables: annual mean temperature (*BIO*1), mean temperature of the coldest quarter (*BIO*11), total annual precipitation (*BIO*12), and precipitation seasonality (*BIO*15). For all pixels in our dataset with mangroves present in 1975, 1990, 2005, or 2015 and available soil carbon estimates35, we regressed the soil carbon estimates (*CarbonSoil*) on these five variables. The resulting regression equation was

.

Significance levels for the variables, based on two-tailed *t* tests, were: *Latitude*, *P* < 0.001; *BIO*1, *P* = 0.843; *BIO*11, *P* < 0.001; *BIO*12, *P* < 0.001; and *BIO*15, *P* < 0.001. The *R*2 was 0.73, and the number of observations was 13,830. We used this equation to impute the missing values.

**References in Supplementary Information**

1. Giri, C. et al. Status and distribution of mangrove forests of the world using earth observation satellite data. *Glob. Ecol. Biogeogr.* **20,** 154–159 (2011).
2. Huang, R., Pimm, S. L. & Giri, C. Using metapopulation theory for practical conservation of mangrove endemic birds. *Conserv. Biol.* **34,** 266–275 (2020).
3. Wildlife Institute of India. Protected areas of India. Accessed 2018-08-21 from wiienvis.nic.in/Database/Protected_Area_854.aspx.
4. SNAPP (Science for Nature and People Partnership). India under construction. Accessed 2018-07-04 from https://indiaunderconstruction.com/about.
5. UNEP-WCMC & IUCN. Protected planet: the world database on protected areas. Accessed 2018-01-13 from https://www.protectedplanet.net/en/thematic-areas/wdpa?tab=WDPA.
6. Esri. Imagery hybrid [basemap]. Accessed 2018-12-05 through ArcGIS.
7. Wildlife Institute of India. Protected area gazette notification database. Accessed 2018-11-24 from wiienvis.nic.in/Database/Protected_Area_854.aspx.
8. Imbens, G. W. Nonparametric estimation of average treatment effects under exogeneity: A review. *Rev. Econ. Stat.* **86,** 4–29 (2004).
9. King, G. & Nielsen, R. Why propensity scores should not be used for matching. *Polit. Anal.* **27,** 435–454 (2019).
10. Ho, D. E., Imai, K., King, G. & Stuart, E. A. Matching as nonparametric preprocessing for reducing model dependence in parametric causal inference. *Polit. Anal.* **15,** 199–236 (2007).
11. Abadie, A. & Spiess, J. Robust post-matching inference. *J. Am. Stat. Assoc.* **117,** 983–995 (2022).
12. Global Forest Watch. Tiger conservation landscapes. Accessed 2020-02-27 from https://data.globalforestwatch.org/datasets/gfw::tiger-conservation-landscapes/about.
13. BirdLife International & Handbook of the Birds of the World. Bird species distribution maps of the world, version 2018.1. Accessed 2019-04-05 from http://datazone.birdlife.org/species/requestdis.
14. ICRISAT, ICAR & IRRI. District level database (apportioned) 1966–67 to 2011–12. Accessed 2018-09-19 from https://vdsa.icrisat.org/vdsa-database.aspx.
15. Agricultural Economics Research Unit. Farmers’ income in India: evidence from secondary data. *Agricultural Situation in India* **72,** 30–70 (2015).
16. World Bank. World development indicators. Accesed 2024-05-05 from https://databank.worldbank.org/source/world-development-indicators.
17. Mandal, C. et al. Revisiting agro-ecological sub-regions of India: a case study of two major food production zones. *Curr. Sci.* **107,** 1519–1536 (2014).
18. Danko, D. M. The digital chart of the world. *GeoInfo Systems* **2,** 29–36 (1992).
19. Dürr , H. H. et al., Worldwide typology of nearshore coastal systems: defining the estuarine filter of river inputs to the oceans. *Estuaries Coast* **34,** 441–458 (2011).
20. Esri. India subdistrict boundaries. Accessed 2019-01-27 from https://www.arcgis.com/home/item.html?id=2f0dac0e7b8244b29aa56289aaf26056.
21. CIESIN. Global population density grid time series estimates, v1 (1970 – 2000). Accessed 2019-1-2 from https://doi.org/10.7927/H47M05W2.
22. CHRR, CIESEN, IBRD & UNEP/GRID. Global cyclone hazard frequency and distribution. Accessed 2019-02-18 from https://doi.org/10.7927/H4CZ353K.
23. Das, S. & Vincent, J. R. Mangroves protected villages and reduced death toll during Indian super cyclone. *P. Natl. Acad. Sci. USA* **106,** 7357–7360 (2009).
24. Ghosh, P. & Ghosh, A. Is ecotourism a panacea? Political ecology perspectives from the Sundarban Biosphere Reserve, India. *GeoJournal* **84,** 345–366 (2019).
25. de Luna, X., Waernbaum, I. & Richardson, T. S. Covariate selection for the nonparametric estimation of an average treatment effect. *Biometrika* **98,** 861–875 (2011).
26. Persson, E., Häggström, J., Waernbaum, I. & de Luna, X. Data-driven algorithms for dimension reduction in causal inference. *Comput. Stat. Data Anal.* **105,** 280–292 (2017).
27. Witte, J. & Didelez, V. Covariate selection strategies for causal inference: classification and comparison. *Biom. J.* **61,** 1270–1289 (2019).
28. Häggström, J., Persson, E., Waernbaum, I. & de Luna, X. CovSel: An R package for covariate selection when estimating average causal effects. *J. Stat. Softw.* **68,** 1–20 (2015).
29. Imai, K., King, G. & Stuart, E. A. Misunderstandings between experimentalists and observationalists about causal inference. *J. R. Stat. Soc. Ser. A Stat. Soc.* **171,** 481–502 (2008).
30. Austin, P. C. Balance diagnostics for comparing the distribution of baseline covariates between treatment groups in propensity-score matched samples. *Statist. Med.* **28,** 3083–3107 (2009).
31. Pfaff, A. & Robalino, J. Spillovers from conservation programs. *Annu. Rev. Resour. Econ.* **9,** 299–315 (2017).
32. Richards, D. R., Thompson, B. S. & Wijedasa, L. Quantifying net loss of global mangrove carbon stocks from 20 years of land cover change. *Nat. Commun.* **11,** 4260 (2020).
33. Hutchison, J., Manica, A., Swetnam, R., Balmford, A. & Spalding, M. Predicting global patterns in mangrove forest biomass. *Conserv. Lett.* **7,** 233-240 (2014).
34. Fick, S. E. & Hijmans, R. J. WorldClim 2: new 1km spatial resolution climate surfaces for global land areas. *Int. J. Climatol.* **37,** 4302–4315 (2017).
35. J. Sanderman et al. A global map of mangrove forest soil carbon at 30 m spatial resolution. *Environ. Res. Lett.* **13,** 055002 (2018).
36. Jardine, S. L. & Siikamäki, J. V. A global predictive model of carbon in mangrove soils. *Environ. Res. Lett.* **9,** 104013 (2014).

**Supplementary Table 1. Covariate balance.** Recommended guidelines30: (i) the absolute value of the standardized mean difference should be below 0.1; and (ii) the variance ratio should be within 0.952–1.051. Observations: raw sample, 6,269 treated and 4,205 untreated pixels; matched sample, 6,269 treated and 6,269 control pixels. Matching was with replacement.

| **Covariate** | **Standardized mean difference** | | **Variance ratio** | |
| --- | --- | --- | --- | --- |
| **Raw** | **Matched** | **Raw** | **Matched** |
| Tiger habitat | 0.65 | 0.00 | 1.63 | 1.00 |
| Potential carbon stock | -0.39 | -0.01 | 0.61 | 1.04 |
| Cyclone frequency | 0.30 | 0.00 | 0.62 | 1.00 |
| 1970 population density | -0.76 | -0.07 | 0.11 | 0.95 |
| 1975 road density | 0.02 | 0.00 | 1.23 | 1.00 |
| 1975 area share of PAs | 0.16 | 0.00 | 0.85 | 1.00 |

**Supplementary Table 2. Investigation of spillovers**. ATET = average treatment effect on the treated. *P* values refer to *z* tests of the null hypothesis that the estimated ATET, which is the mean difference between avoided deforestation in the sample of treated pixels and avoided deforestation in the matched sample of control pixels, equals zero. The number of matched pairs in all tests was 6,269.

| **Buffer distance (km)** | **Number of pixels** | | **ATET: avoided deforestation** | ***P* value of ATET** |
| --- | --- | --- | --- | --- |
| **Treated** | **Untreated** |
| 0 | 6269 | 4205 | −0.021 | 0.484 |
| 1 | 6269 | 3913 | 0.016 | 0.589 |
| 2 | 6269 | 3672 | 0.018 | 0.562 |
| 3 | 6269 | 3427 | 0.020 | 0.525 |
| 4 | 6269 | 3154 | 0.033 | 0.101 |
| 5 | 6269 | 2885 | 0.034 | 0.046 |
| 6 | 6269 | 2629 | 0.021 | 0.290 |
| 7 | 6269 | 2405 | 0.065 | 0.041 |
| 8 | 6269 | 2137 | 0.033 | 0.250 |

**Supplementary Table 3. Descriptive statistics on outcome measures and their components. “**Potential carbon stock” refers to undisturbed, natural mangroves. “Carbon” and “NPV” account for 2015 mangrove status; see corresponding equations in the Methods section of the main text. “Opportunity cost of protection” refers to capitalized agricultural land value at a 4.36% yr–1 discount rate and was used to construct the NPV for the low carbon price. Opportunity cost was higher by ratios of 4.36/3 for the medium carbon price and 4.36/2 for the high carbon price, which were based on discount rates of 3% yr–1 and 2% yr–1 , respectively.

**a. Treated pixels** (*N* = 6,269)

| **Variable** | **Mean** | **SD** | **Minimum** | **Maximum** |
| --- | --- | --- | --- | --- |
| Dummy: 2015 mangrove presence | 0.913 | 0.282 | 0 | 1 |
| Potential carbon stock: total  (t ha–1) | 234 | 58.9 | 174 | 579 |
| Potential carbon stock: AGB  (t ha–1) | 66.1 | 2.56 | 52.7 | 76.4 |
| Potential carbon stock: BGB  (t ha–1) | 23.4 | 1.17 | 17.3 | 28.3 |
| Potential carbon stock: soil  (t ha–1) | 144 | 58.1 | 85.0 | 483 |
| NPV: low carbon price  (2020 USD ha– 1) | 6,383 | 3,293 | 1,887 | 38,168 |
| NPV: medium carbon price  (2020 USD ha– 1) | 42,534 | 11,093 | 14,188 | 108,307 |
| NPV: high carbon price  (2020 USD ha– 1) | 155,543 | 41,966 | 52,853 | 403,495 |
| Opportunity cost of protection  (2020 USD ha– 1) | 10,149 | 4,873 | 1.61 | 31,227 |

**b. Untreated pixels** (*N* = 4,205)

| **Variable** | **Mean** | **SD** | **Minimum** | **Maximum** |
| --- | --- | --- | --- | --- |
| Dummy: 2015 mangrove presence | 0.774 | 0.419 | 0 | 1 |
| Potential carbon stock: total  (t ha–1) | 260 | 75.6 | 183 | 567 |
| Potential carbon stock: AGB  (t ha–1) | 68.2 | 6.29 | 53.4 | 104 |
| Potential carbon stock: BGB  (t ha–1) | 24.4 | 3.05 | 17.7 | 42.5 |
| Potential carbon stock: soil  (t ha–1) | 167 | 70.0 | 94.0 | 455 |
| NPV: low carbon price  (2020 USD ha– 1) | 9,173 | 16,509 | 1,959 | 256,375 |
| NPV: medium carbon price  (2020 USD ha– 1) | 46,489 | 24,976 | 14,730 | 397,511 |
| NPV: high carbon price  (2020 USD ha– 1) | 161,195 | 53,088 | 54,870 | 664,987 |
| Opportunity cost of protection  (2020 USD ha– 1) | 13,173 | 25,003 | 1.61 | 252,270 |
